# Supplementary material
Source: publisher figshare collection journal article supplement (https://plos.figshare.com/articles/dataset/_/8134652)

## **S1 File: Supplementary Tables and Figures**

### **Malaria vector species in Amazonian Peru co-occur in larval habitats but have distinct larval microbial communities**

Catharine Prussing, Marlon P. Saavedra, Sara A. Bickersmith, Freddy Alava, Mitchel Guzmán, Edgar Manrique, Gabriel Carrasco-Escobar, Marta Moreno, Dionicia Gamboa, Joseph M. Vinetz, Jan E. Conn

**Table I:** Primer sequences

| Use                           | Primer name       | Sequence                                                      |
|-------------------------------|-------------------|---------------------------------------------------------------|
| ITS2 PCR-RFLP                 | CP16              | 5'-GCGGGTACCATGCTTAAATTTAGGGGGTA-3'                           |
| ITS2 PCR-RFLP                 | CP17              | 5'-GCGCCGCGGTGTGAACTGCAGGACACATG-3'                           |
| COI barcode sequencing        | LCO1490           | 5'-GGTCAACAAATCATAAAGATATTGG-3'                               |
| COI barcode sequencing        | HCO2198           | 5'-TAAACTTCAGGGTGACCAAAAAATCA-3'                              |
| Bacterial 16S rRNA sequencing | Illumina_Bakt341F | 5'-TCGTCCGCAGCGTCAGATGTGTATAAGAGACAGCCTACGGGNGGCWGCAG-3'      |
| Bacterial 16S rRNA sequencing | Illumina_Bakt805R | 5'-GTCTCGTGGGCTCGGAGATGTGTATAAGAGACAGGACTACHVGGGTATCTAATCC-3' |

**Table II:** Dates of Google Earth imagery used for distance to nearest forest calculations

| Village               | Month                                        |
|-----------------------|----------------------------------------------|
| Visto Bueno (VIB)     | September 2016                               |
| Urco Mirañó (URC)     | September 2016                               |
| Salvador (SAL)        | September 2016                               |
| Libertad (LIB)        | September 2016                               |
| Lupuna (LUP)          | February 2017                                |
| Nuevo Horizonte (NHO) | November 2013                                |
| El Triunfo (TRI)      | November 2013                                |
| Santa Emilia (SEM)    | N/A – imagery not available for this village |

**Table III:** Results of bivariate and multivariate logistic mixed-effects models for the presence of *Ny. darlingi* larvae

| Variable*                                                        | Bivariate Odds Ratio (95% CI) | Bivariate <i>p</i> -value | Multivariate Odds Ratio (95% CI) | Multivariate <i>p</i> -value |
|------------------------------------------------------------------|-------------------------------|---------------------------|----------------------------------|------------------------------|
| <b>Fixed effects</b>                                             |                               |                           |                                  |                              |
| Intercept                                                        | -                             | -                         | 0.14 (0.008, 2.37)               | 0.171                        |
| Non- <i>Ny. darlingi</i> Anophelinae species present             | 35.90 (17.04, 75.63)          | <0.001                    | 36.59 (15.38, 87.05)             | <0.001                       |
| Light intensity (Fc/1000)                                        | 0.09 (0.02, 0.35)             | 0.001                     | 0.14 (0.03, 0.58)                | 0.007                        |
| Grass present                                                    | 5.81 (2.25, 14.99)            | <0.001                    | 2.79 (0.93, 8.34)                | 0.067                        |
| Fish present                                                     | 3.80 (1.60, 9.01)             | 0.002                     | 2.69 (0.92, 7.91)                | 0.071                        |
| Quarter (ref=July-September 2016)                                |                               |                           |                                  |                              |
| January-March 2016                                               | 3.04 (1.23, 7.51)             | 0.016                     | 1.52 (0.49, 4.71)                | 0.465                        |
| April-June 2016                                                  | 1.68 (0.69, 4.12)             | 0.254                     | 1.08 (0.36, 3.24)                | 0.897                        |
| October-December 2016                                            | 2.89 (1.21, 6.91)             | 0.017                     | 2.53 (0.89, 7.23)                | 0.083                        |
| January-March 2017                                               | 2.76 (1.11, 6.90)             | 0.030                     | 1.34 (0.43, 4.17)                | 0.611                        |
| Organic bed material (ref=mixed, mud, or sand)                   | 6.47 (1.62, 25.85)            | 0.008                     | 3.49 (0.94, 12.92)               | 0.061                        |
| Amphibians present                                               | 2.40 (1.26, 4.56)             | 0.008                     | 1.98 (0.90, 4.32)                | 0.088                        |
| Cloudy sky (ref=clear)                                           | 2.37 (1.23, 4.58)             | 0.010                     | -                                | -                            |
| Village: LIB, LUP, NHO, SAL or VIB (ref=SEM, TRI, or URC)        | 3.79 (1.27, 11.26)            | 0.017                     | -                                | -                            |
| Shade level (ref=none)                                           |                               |                           |                                  |                              |
| Partial shade                                                    | 2.63 (1.07, 6.43)             | 0.035                     | -                                | -                            |
| Total shade                                                      | 2.60 (0.94, 7.23)             | 0.067                     | -                                | -                            |
| EVI (500m radius)                                                | 0.05 (0.003, 0.72)            | 0.028                     | 0.01 (0.0003, 0.40)              | 0.014                        |
| Active fish pond (ref=abandoned fish pond or natural water body) | 3.24 (1.16, 9.04)             | 0.025                     | -                                | -                            |
| Emergent vegetation present                                      | 1.88 (0.92, 3.83)             | 0.084                     | 2.54 (1.06, 6.07)                | 0.036                        |
| Temperature (°C)                                                 | 0.81 (0.63, 1.04)             | 0.098                     | -                                | -                            |
| Number of people living in a 100m radius                         | 1.02 (0.997, 1.04)            | 0.092                     | -                                | -                            |
| Percent forest loss 2010-2016 (500m radius)                      | 1.27 (0.95, 1.68)             | 0.102                     | 1.38 (1.06, 1.80)                | 0.016                        |
| Temporal water body (ref=permanent)                              | 0.46 (0.16, 1.28)             | 0.137                     | -                                | -                            |
| Floating vegetation present                                      | 1.97 (0.71, 5.49)             | 0.195                     | -                                | -                            |
| Bushes present                                                   | 1.62 (0.80, 3.28)             | 0.179                     | -                                | -                            |
| <b>Random effects</b>                                            |                               |                           |                                  |                              |
|                                                                  |                               |                           | ICC: 0.27                        |                              |
|                                                                  |                               |                           | MOR: 2.86                        |                              |

\*Variables not associated with the presence of *Ny. darlingi* (bivariate logistic mixed-effects regression  $p > 0.2$ ): alkalinity; conductivity; depth; distance to nearest forest; distance to *Ny. darlingi*-positive water body; distance to non-dry water body; hardness; NDWI (any buffer); pH; salinity; percent forest cover cover (any buffer); presence of algae or trees; water moving or turbid

**Table IV:** Results of bivariate and multivariate logistic mixed-effects models for the presence of *Ny. rangeli* larvae

| Variable*                                                        | Bivariate Odds Ratio (95% CI) | Bivariate <i>p</i> -value | Multivariate Odds Ratio (95% CI)  | Multivariate <i>p</i> -value |
|------------------------------------------------------------------|-------------------------------|---------------------------|-----------------------------------|------------------------------|
| <b>Fixed effects</b>                                             |                               |                           |                                   |                              |
| Intercept                                                        | -                             | -                         | 0.003 (5x10 <sup>-5</sup> , 0.16) | 0.004                        |
| Non- <i>Ny. rangeli</i> Anophelinae species present              | 100.54 (16.82, 600.97)        | <0.001                    | 138.08 (22.32, 854.31)            | <0.001                       |
| Quarter (ref=July-September 2016)                                |                               |                           |                                   |                              |
| January-March 2016                                               | 1.17 (0.35, 3.90)             | 0.795                     | 1.14 (0.27, 4.72)                 | 0.862                        |
| April-June 2016                                                  | 1.57 (0.49, 5.09)             | 0.449                     | 2.12 (0.52, 8.59)                 | 0.293                        |
| October-December 2016                                            | 1.83 (0.59, 5.62)             | 0.295                     | 1.13 (0.28, 4.56)                 | 0.864                        |
| January-March 2017                                               | 7.59 (2.44, 23.64)            | <0.001                    | 8.17 (1.98, 33.70)                | 0.004                        |
| Village: SAL or URC (ref=LIB, LUP, NHO, SEM, TRI, or VIB)        | 9.07 (3.29, 24.99)            | <0.001                    | 6.37 (1.98, 20.50)                | 0.002                        |
| Active fish pond (ref=abandoned fish pond or natural water body) | 3.84 (1.43, 10.35)            | 0.008                     | -                                 | -                            |
| Cloudy sky (ref=clear)                                           | 2.81 (1.26, 6.27)             | 0.011                     | -                                 | -                            |
| Depth (m)                                                        | 0.71 (0.55, 0.93)             | 0.013                     | -                                 | -                            |
| Mixed bed material (ref=organic material, mud, or sand)          | 0.29 (0.11, 0.78)             | 0.014                     | -                                 | -                            |
| Grass present                                                    | 3.78 (1.17, 12.21)            | 0.026                     | -                                 | -                            |
| Distance to nearest forest (m)                                   | 1.01 (1.003, 1.02)            | 0.014                     | 1.01 (1.002, 1.02)                | 0.017                        |
| Bushes present                                                   | 2.62 (1.15, 5.96)             | 0.022                     | 2.92 (1.20, 7.10)                 | 0.018                        |
| Amphibians present                                               | 2.19 (1.07, 4.52)             | 0.033                     | 1.73 (0.78, 3.85)                 | 0.176                        |
| Number of people living in a 100m radius                         | 1.02 (1.00098, 1.04)          | 0.038                     | 1.02 (1.004, 1.03)                | 0.013                        |
| EVI (500m radius)                                                | 0.04 (0.002, 0.80)            | 0.035                     | 0.02 (0.0003, 1.26)               | 0.065                        |
| Fish present                                                     | 2.95 (0.99, 8.75)             | 0.051                     | -                                 | -                            |
| Trees present                                                    | 2.00 (0.87, 4.58)             | 0.101                     | -                                 | -                            |
| Percent forest cover (250m radius)                               | 0.97 (0.94, 1.00)             | 0.090                     | -                                 | -                            |
| Salinity (ppm)                                                   | 1.03 (0.999, 1.07)            | 0.060                     | -                                 | -                            |
| Water moving                                                     | 0.37 (0.10, 1.32)             | 0.126                     | 0.29 (0.08, 1.03)                 | 0.056                        |
| Algae present                                                    | 2.67 (0.77, 9.24)             | 0.121                     | 3.78 (0.84, 17.01)                | 0.082                        |
| Light intensity (Fc/1000)                                        | 0.36 (0.09, 1.45)             | 0.150                     | -                                 | -                            |
| Conductivity (uS/cm)                                             | 0.98 (0.96, 1.01)             | 0.186                     | -                                 | -                            |
| Shade level (ref=none)                                           |                               |                           |                                   |                              |
| Partial shade                                                    | 2.27 (0.76, 6.74)             | 0.141                     | -                                 | -                            |
| Total shade                                                      | 1.63 (0.47, 5.61)             | 0.441                     | -                                 | -                            |
| pH                                                               | 1.38 (0.87, 2.18)             | 0.166                     | -                                 | -                            |
| NDWI (250m radius)                                               | 0.02 (0.0001, 6.02)           | 0.187                     | -                                 | -                            |
| <b>Random effects</b>                                            |                               |                           |                                   |                              |
|                                                                  |                               |                           | ICC: 0.05                         |                              |
|                                                                  |                               |                           | MOR: 1.38                         |                              |

\*Variables not associated with the presence of *Ny. rangeli* (bivariate logistic mixed-effects regression *p* > 0.2): alkalinity; distance to *Ny. darlingi*-positive water body; distance to non-dry water body; hardness; percent forest loss 2010-2016 (any buffer); temperature; presence of floating or emergent vegetation; water body temporality; water turbid

**Table V:** Results of bivariate and multivariate logistic mixed-effects models for the presence of *Ny. triannulatus* s.l. larvae

| Variable*                                                        | Bivariate Odds Ratio (95% CI) | Bivariate <i>p</i> -value | Multivariate Odds Ratio (95% CI)    | Multivariate <i>p</i> -value |
|------------------------------------------------------------------|-------------------------------|---------------------------|-------------------------------------|------------------------------|
| <b>Fixed effects</b>                                             |                               |                           |                                     |                              |
| Intercept                                                        | -                             | -                         | 0.0005 (3x10 <sup>-5</sup> , 0.007) | <0.001                       |
| Non- <i>Ny. triannulatus</i> s.l. Anophelinae species present    | 21.02 (7.57, 58.37)           | <0.001                    | 87.07 (18.38, 412.43)               | <0.001                       |
| Quarter (ref=January-March 2016)                                 |                               |                           |                                     |                              |
| April-June 2016                                                  | 8.64 (1.47, 50.77)            | 0.017                     | 9.65 (1.32, 70.37)                  | 0.025                        |
| July-September 2016                                              | 11.70 (1.98, 69.05)           | 0.007                     | 18.54 (2.34, 146.72)                | 0.006                        |
| October-December 2016                                            | 11.41 (2.00, 64.92)           | 0.006                     | 8.72 (1.18, 64.38)                  | 0.034                        |
| January-March 2017                                               | 79.24 (13.04, 481.47)         | <0.001                    | 261.11 (26.90, 2534.67)             | <0.001                       |
| Village: SAL or URC (ref=LIB, LUP, NHO, SEM, TRI, or VIB)        | 8.13 (3.36, 19.68)            | <0.001                    | 16.45 (3.85, 70.23)                 | <0.001                       |
| Fish present                                                     | 7.47 (1.86, 30.00)            | 0.005                     | -                                   | -                            |
| Depth (m)                                                        | 0.69 (0.53, 0.89)             | 0.004                     | -                                   | -                            |
| Emergent vegetation present                                      | 0.34 (0.15, 0.74)             | 0.006                     | 0.15 (0.04, 0.55)                   | 0.004                        |
| Active fish pond (ref=abandoned fish pond or natural water body) | 3.45 (1.50, 7.94)             | 0.004                     | -                                   | -                            |
| Mud bed material (ref=organic material, sand, or mixed)          | 2.85 (1.28, 6.36)             | 0.011                     | -                                   | -                            |
| Amphibians present                                               | 2.45 (1.23, 4.89)             | 0.011                     | 2.53 (0.92, 6.95)                   | 0.072                        |
| Floating vegetation present                                      | 3.68 (1.34, 10.10)            | 0.011                     | -                                   | -                            |
| Distance to nearest forest (m)                                   | 1.01 (1.002, 1.02)            | 0.021                     | -                                   | -                            |
| Bushes present                                                   | 2.37 (1.09, 5.16)             | 0.030                     | -                                   | -                            |
| pH                                                               | 1.55 (1.004, 2.38)            | 0.048                     | -                                   | -                            |
| Grass present                                                    | 2.40 (0.86, 6.73)             | 0.096                     | -                                   | -                            |
| Shade level (ref=none)                                           |                               |                           |                                     |                              |
| Partial shade                                                    | 1.92 (0.72, 5.13)             | 0.195                     | -                                   | -                            |
| Total shade                                                      | 1.07 (0.34, 3.39)             | 0.912                     | -                                   | -                            |
| Water moving                                                     | 0.39 (0.12, 1.31)             | 0.128                     | 0.07 (0.01, 0.37)                   | 0.002                        |
| Percent forest cover (500m radius)                               | 0.97 (0.94, 1.01)             | 0.124                     | -                                   | -                            |
| Salinity (ppm)                                                   | 1.02 (0.99, 1.06)             | 0.183                     | -                                   | -                            |
| Non-zero alkalinity (ref=0)                                      | 2.29 (0.80, 6.52)             | 0.121                     | -                                   | -                            |
| EVI (500m radius)                                                | 0.11 (0.006, 1.91)            | 0.129                     | -                                   | -                            |
| Any people living in a 50m radius                                | 1.88 (0.72, 4.89)             | 0.199                     | -                                   | -                            |
| <b>Random effects</b>                                            |                               |                           |                                     |                              |
|                                                                  |                               |                           | ICC: 0.33                           |                              |
|                                                                  |                               |                           | MOR: 3.37                           |                              |

\*Variables not associated with the presence of *Ny. triannulatus* s.l. (bivariate logistic mixed-effects regression  $p > 0.2$ ): cloud cover; conductivity; distance to *Ny. darlingi*-positive water body; distance to non-dry water body; hardness; percent forest loss 2010-2016 (any buffer); NDWI (any buffer); light intensity; presence of trees or algae; temperature; water body temporality; water turbid

**Table VI:** Results of bivariate and multivariate logistic mixed-effects models for the presence of *Ny. sp. nr. konderi* larvae

| Variable*                                                        | Bivariate Odds Ratio (95% CI) | Bivariate <i>p</i> -value | Multivariate Odds Ratio (95% CI)    | Multivariate <i>p</i> -value |
|------------------------------------------------------------------|-------------------------------|---------------------------|-------------------------------------|------------------------------|
| <b>Fixed effects</b>                                             |                               |                           |                                     |                              |
| Intercept                                                        | -                             | -                         | 0.0002 (6x10 <sup>-6</sup> , 0.006) | <0.001                       |
| Non- <i>Ny. sp. nr. konderi</i> Anophelinae species present      | 18.79 (6.87, 51.36)           | <0.001                    | 14.09 (4.93, 40.25)                 | <0.001                       |
| Shade level (ref=none)                                           |                               |                           |                                     |                              |
| Partial shade                                                    | 7.95 (1.66, 38.13)            | 0.010                     | 10.02 (1.54, 65.03)                 | 0.016                        |
| Total shade                                                      | 13.61 (2.67, 69.43)           | 0.002                     | 12.57 (1.84, 85.89)                 | 0.010                        |
| Light intensity (Fc/1000)                                        | 0.06 (0.009, 0.35)            | 0.002                     | 0.23 (0.03, 1.65)                   | 0.142                        |
| Quarter (ref=January-March 2017)                                 |                               |                           |                                     |                              |
| January-March 2016                                               | 4.10 (1.32, 12.74)            | 0.015                     | 4.52 (1.38, 14.80)                  | 0.013                        |
| April-June 2016                                                  | 3.85 (1.23, 12.04)            | 0.021                     | 4.05 (1.22, 13.45)                  | 0.023                        |
| July-September 2016                                              | 1.49 (0.43, 5.15)             | 0.527                     | 2.31 (0.63, 8.50)                   | 0.208                        |
| October-December 2016                                            | 2.08 (0.67, 6.42)             | 0.205                     | 1.81 (0.57, 5.73)                   | 0.316                        |
| Grass present                                                    | 4.80 (1.45, 15.90)            | 0.010                     | -                                   | -                            |
| Active fish pond (ref=abandoned fish pond or natural water body) | 3.68 (1.45, 9.36)             | 0.006                     | 2.40 (0.91, 6.31)                   | 0.076                        |
| Organic bed material (ref=mixed, mud, or sand)                   | 5.33 (1.50, 18.93)            | 0.010                     | -                                   | -                            |
| Any people living in a 100m radius                               | 0.35 (0.15, 0.85)             | 0.020                     | 0.32 (0.13, 0.79)                   | 0.014                        |
| Distance to nearest forest (m)                                   | 0.99 (0.97, 0.999)            | 0.033                     | 0.99 (0.98, 1.00)                   | 0.108                        |
| Cloudy sky (ref=clear)                                           | 2.51 (1.15, 5.47)             | 0.020                     | -                                   | -                            |
| NDVI (100m radius)                                               | 10.02 (1.02, 97.97)           | 0.048                     | -                                   | -                            |
| NDWI (100m radius)                                               | 102.07 (0.60, 17322)          | 0.077                     | -                                   | -                            |
| Percent forest cover (250m radius)                               | 1.03 (0.996, 1.06)            | 0.097                     | 1.06 (1.02, 1.09)                   | 0.001                        |
| Temperature (°C)                                                 | 0.79 (0.59, 1.06)             | 0.111                     | -                                   | -                            |
| Percent forest loss 2010-2016 (500m radius)                      | 1.22 (0.96, 1.54)             | 0.098                     | -                                   | -                            |
| Bushes present                                                   | 1.71 (0.77, 3.79)             | 0.184                     | -                                   | -                            |
| Temporal water body (ref=permanent)                              | 0.54 (0.21, 1.38)             | 0.198                     | -                                   | -                            |
| <b>Random effects</b>                                            |                               |                           |                                     |                              |
|                                                                  |                               |                           | ICC: 0.01                           |                              |
|                                                                  |                               |                           | MOR: 1.28                           |                              |

\*Variables not associated with the presence of *Ny. sp. nr. konderi* (bivariate logistic mixed-effects regression  $p > 0.2$ ): village; alkalinity; conductivity; depth; distance to *Ny. darlingi*-positive water body; distance to non-dry water body; hardness; presence of fish or amphibians; pH; salinity; presence of algae, emergent vegetation, floating vegetation, or trees; water moving or turbid

**Table VII:** Number of reported cases of *Plasmodium vivax* and *Plasmodium falciparum* in each study village by season, 2016

| Village      | Population | 2016 Annual<br>Parasite Incidence<br>(API) per 1000<br>inhabitants <sup>1</sup> | Rainy season,<br>January-June            |                                                      | Dry season,<br>July-December             |                                                      |
|--------------|------------|---------------------------------------------------------------------------------|------------------------------------------|------------------------------------------------------|------------------------------------------|------------------------------------------------------|
|              |            |                                                                                 | Cases of<br><i>P. vivax</i> <sup>1</sup> | Cases of <i>P.</i><br><i>falciparum</i> <sup>1</sup> | Cases of<br><i>P. vivax</i> <sup>1</sup> | Cases of <i>P.</i><br><i>falciparum</i> <sup>1</sup> |
| LUP          | 381        | 659                                                                             | 101                                      | 71                                                   | 34                                       | 45                                                   |
| NHO          | 228        | 171                                                                             | 35                                       | 1                                                    | 2                                        | 1                                                    |
| TRI          | 245        | 78                                                                              | 14                                       | 1                                                    | 4                                        | 0                                                    |
| SEM          | 207        | 130                                                                             | 24                                       | 1                                                    | 2                                        | 0                                                    |
| LIB          | 264        | 367                                                                             | 59                                       | 27                                                   | 7                                        | 4                                                    |
| SAL          | 318        | 311                                                                             | 70                                       | 22                                                   | 1                                        | 6                                                    |
| URC          | 267        | 22                                                                              | 5                                        | 1                                                    | 0                                        | 0                                                    |
| VIB          | 59         | 305                                                                             | 6                                        | 4                                                    | 3                                        | 5                                                    |
| <b>Total</b> | 1969       |                                                                                 | 314                                      | 128                                                  | 53                                       | 61                                                   |

<sup>1</sup>Excludes repeat diagnoses within 60 days for *P. vivax*, 30 days for *P. falciparum*

**Fig I:** Median-joining *COI* haplotype network for members of the *Nyssorhynchus* Oswaldoi-Konderi complex from the current study and from GenBank (S2 Dataset). Circles represent unique haplotypes and are colored based on species (GenBank sequences) or sample origin (sequences from this study). The size of each circle is proportional to the number of individual sequences sharing the haplotype. Black nodes indicate theoretical missing haplotypes, and hash marks represent mutation steps between haplotypes.

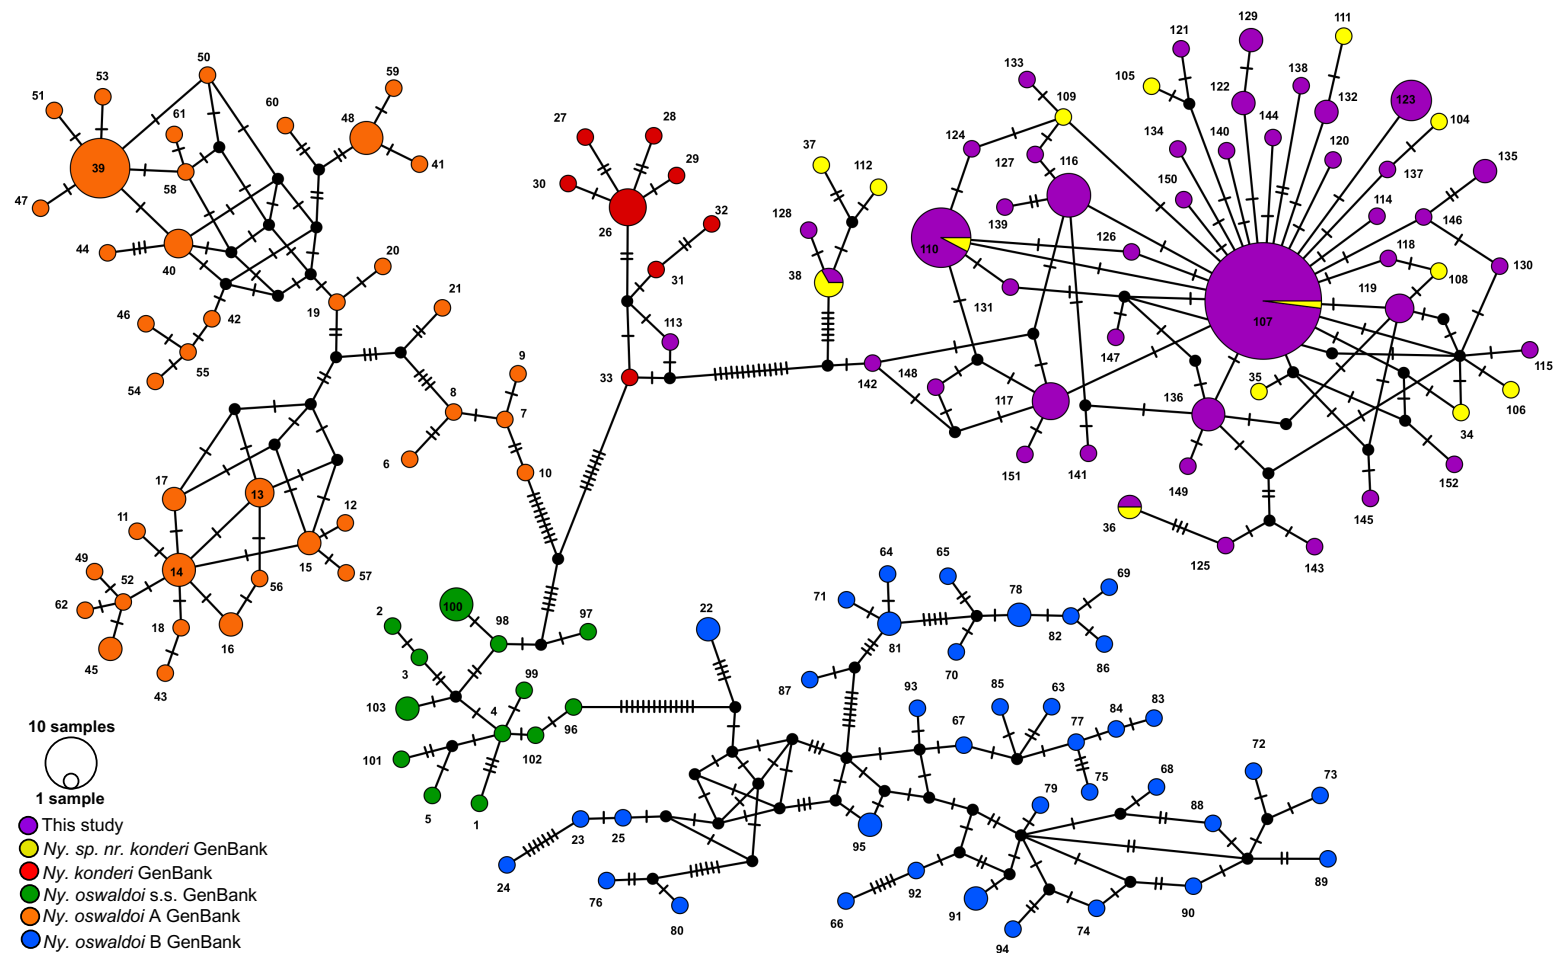

**Fig II:** Number and species of identified Anophelinae larvae by quarter in each village

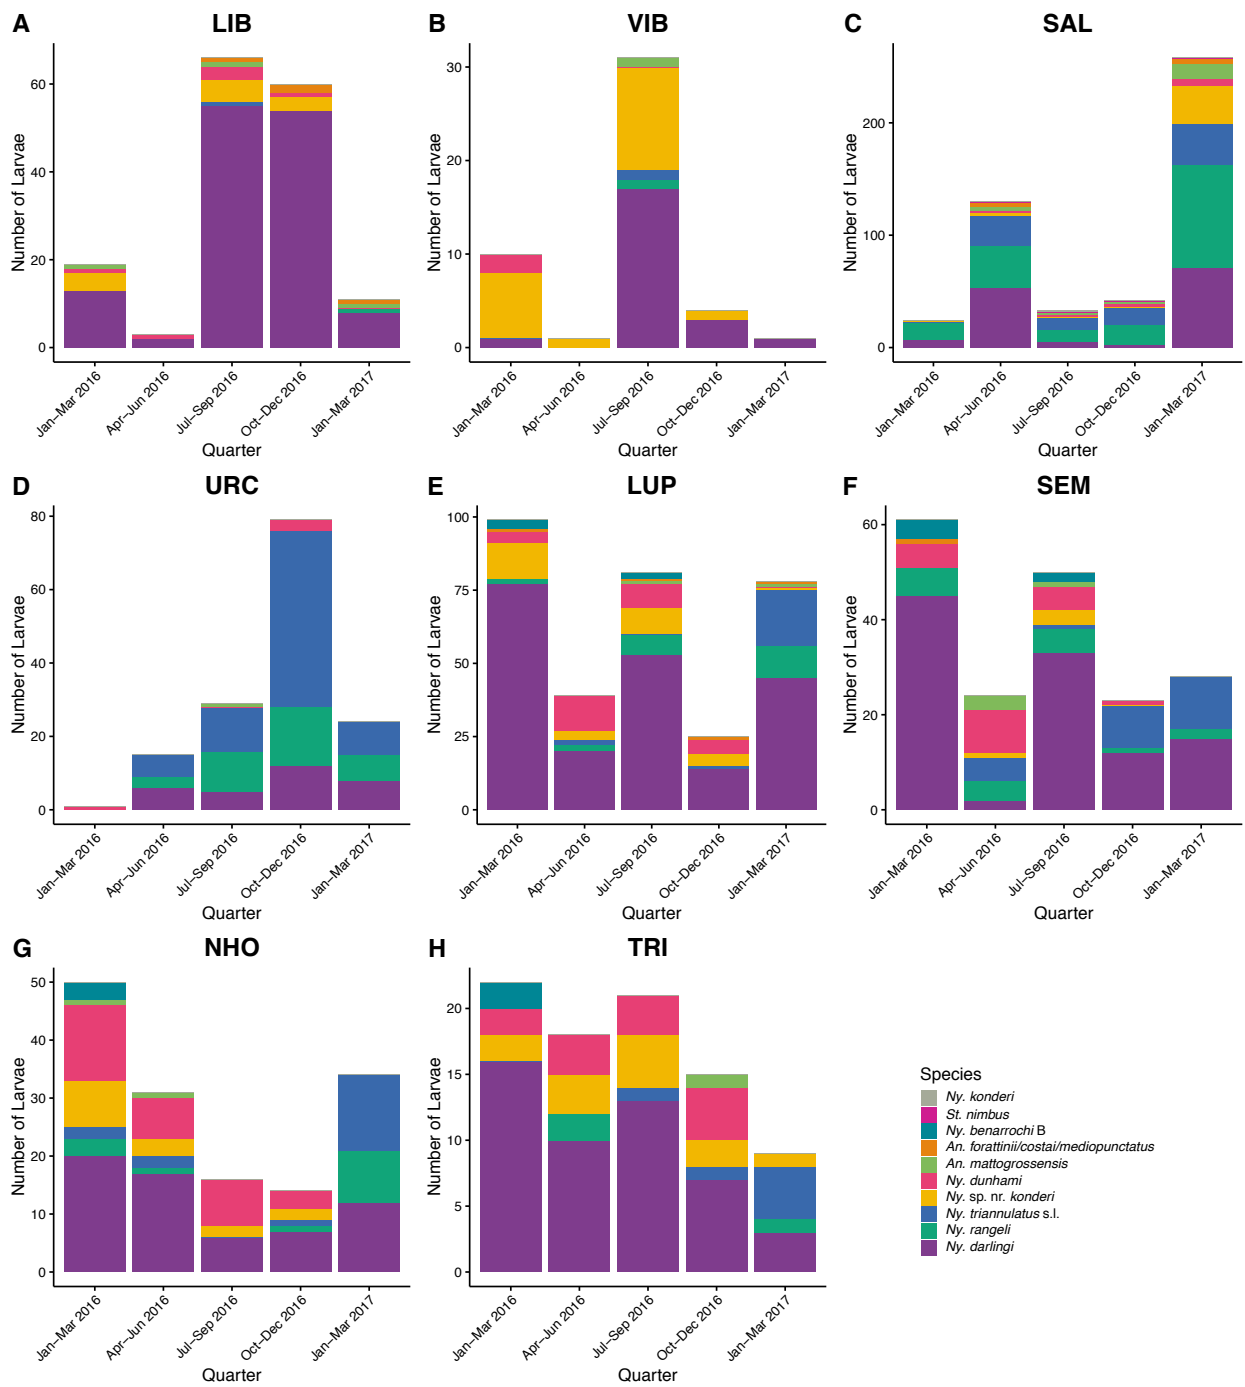



**Fig IV:** Alpha rarefaction curve from bacterial 16S rRNA sequencing, generated by sampling between 1 and 20,000 reads per larva, increasing in increments of 2,000 until the total number of reads per sample was reached. Ten iterations were computed at each step, and the smoothed mean number of OTUs observed for each larva at each step are shown.

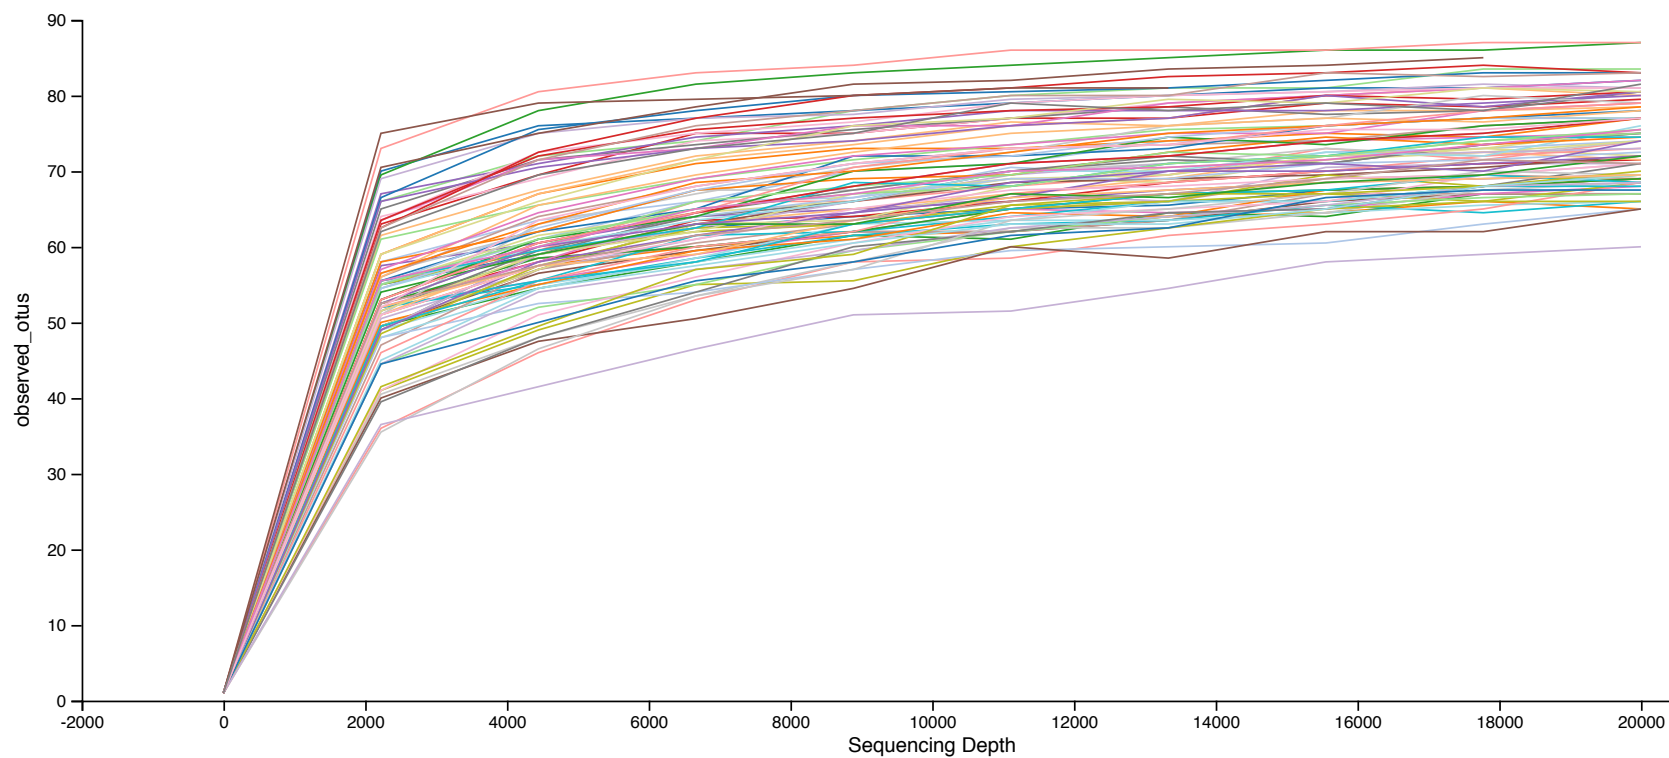

**Fig V:** Principal Coordinates Analysis (PCoA) of (A) weighted UniFrac, (B) Bray-Curtis distance matrices of *Nyssorhynchus* larval bacterial communities, with individual larvae colored by species. Ellipses indicate 95% confidence intervals around each species.

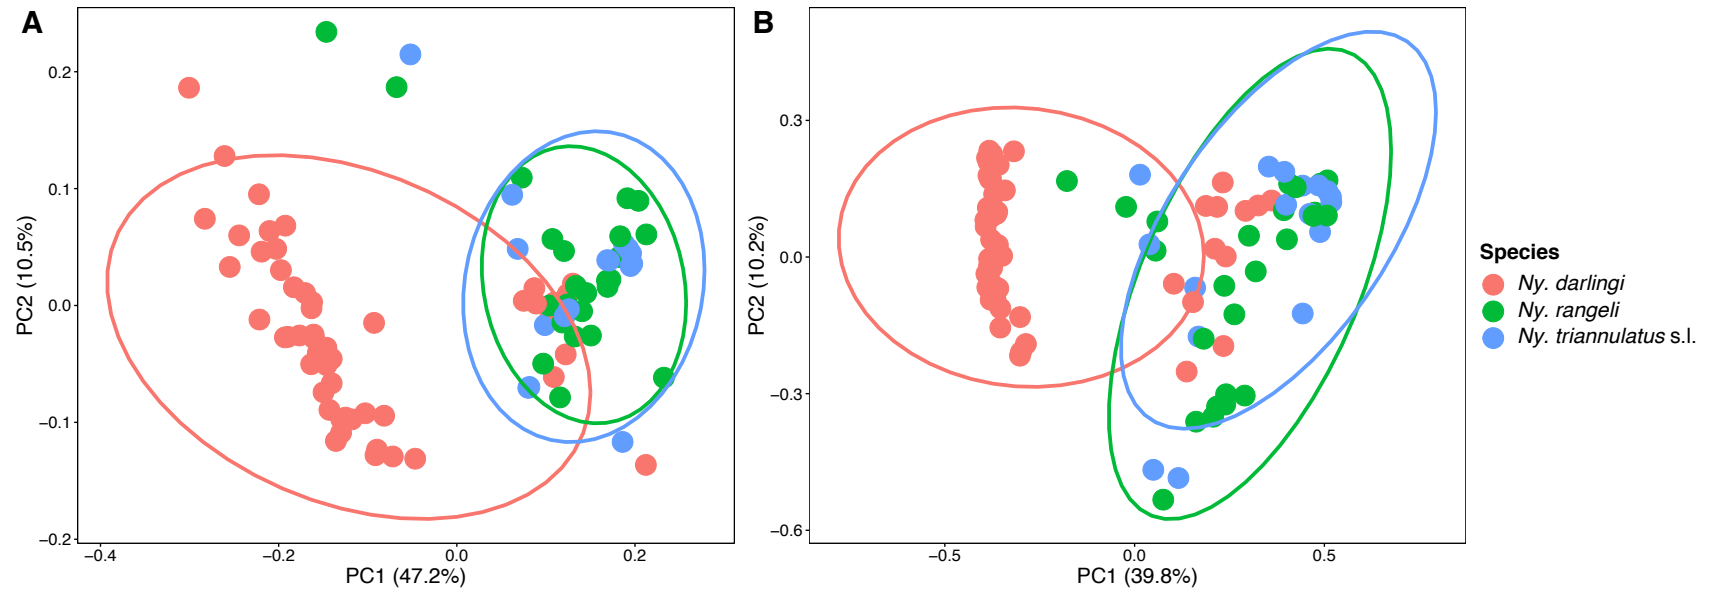

**Fig VI:** Principal Coordinates Analysis (PCoA) of (A) unweighted UniFrac, (B) weighted UniFrac, (C) Bray-Curtis distance matrices of *Nyssorhynchus* larval bacterial communities, with individual larvae colored by water body. Confidence intervals are not shown for clarity.

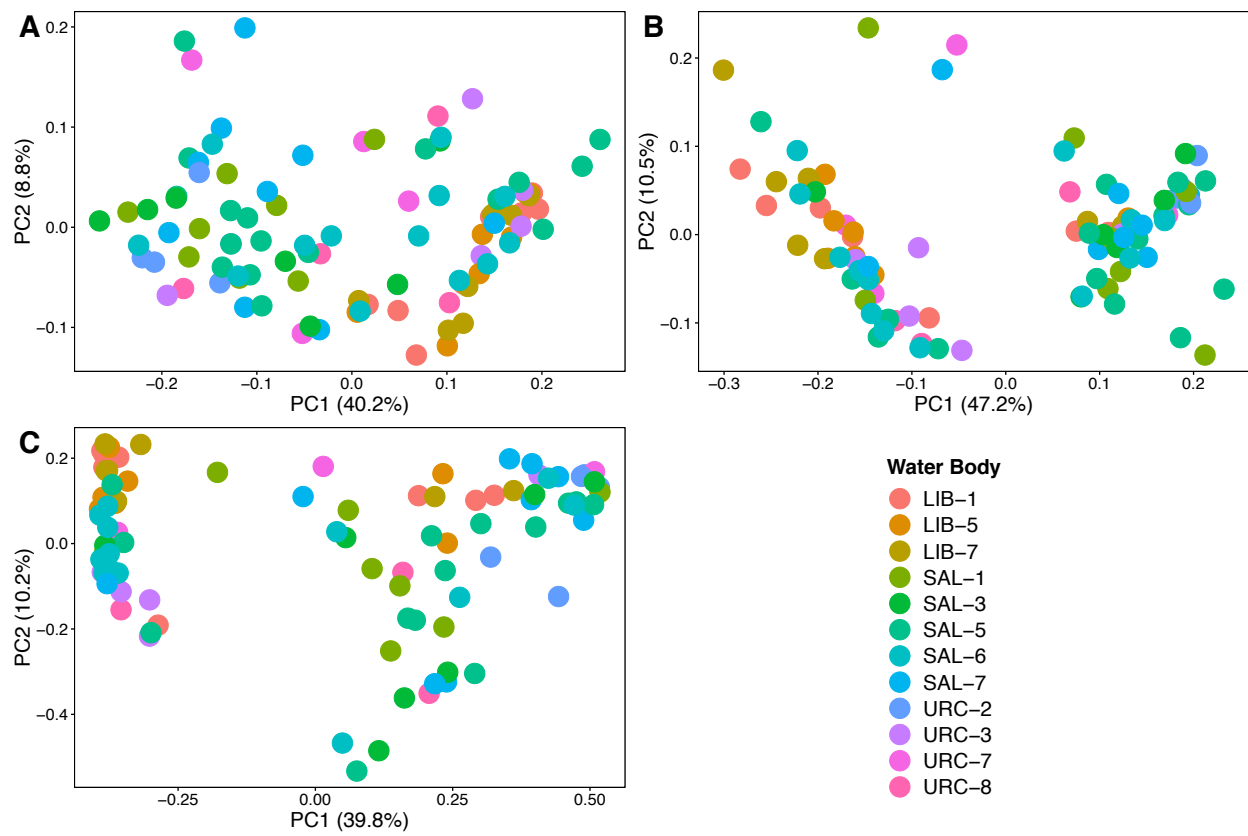

**Fig VII:** Bacterial family composition of each *Nyssorhynchus* larva, ordered by larval species (labels on top), then by water body ID (labels on bottom)

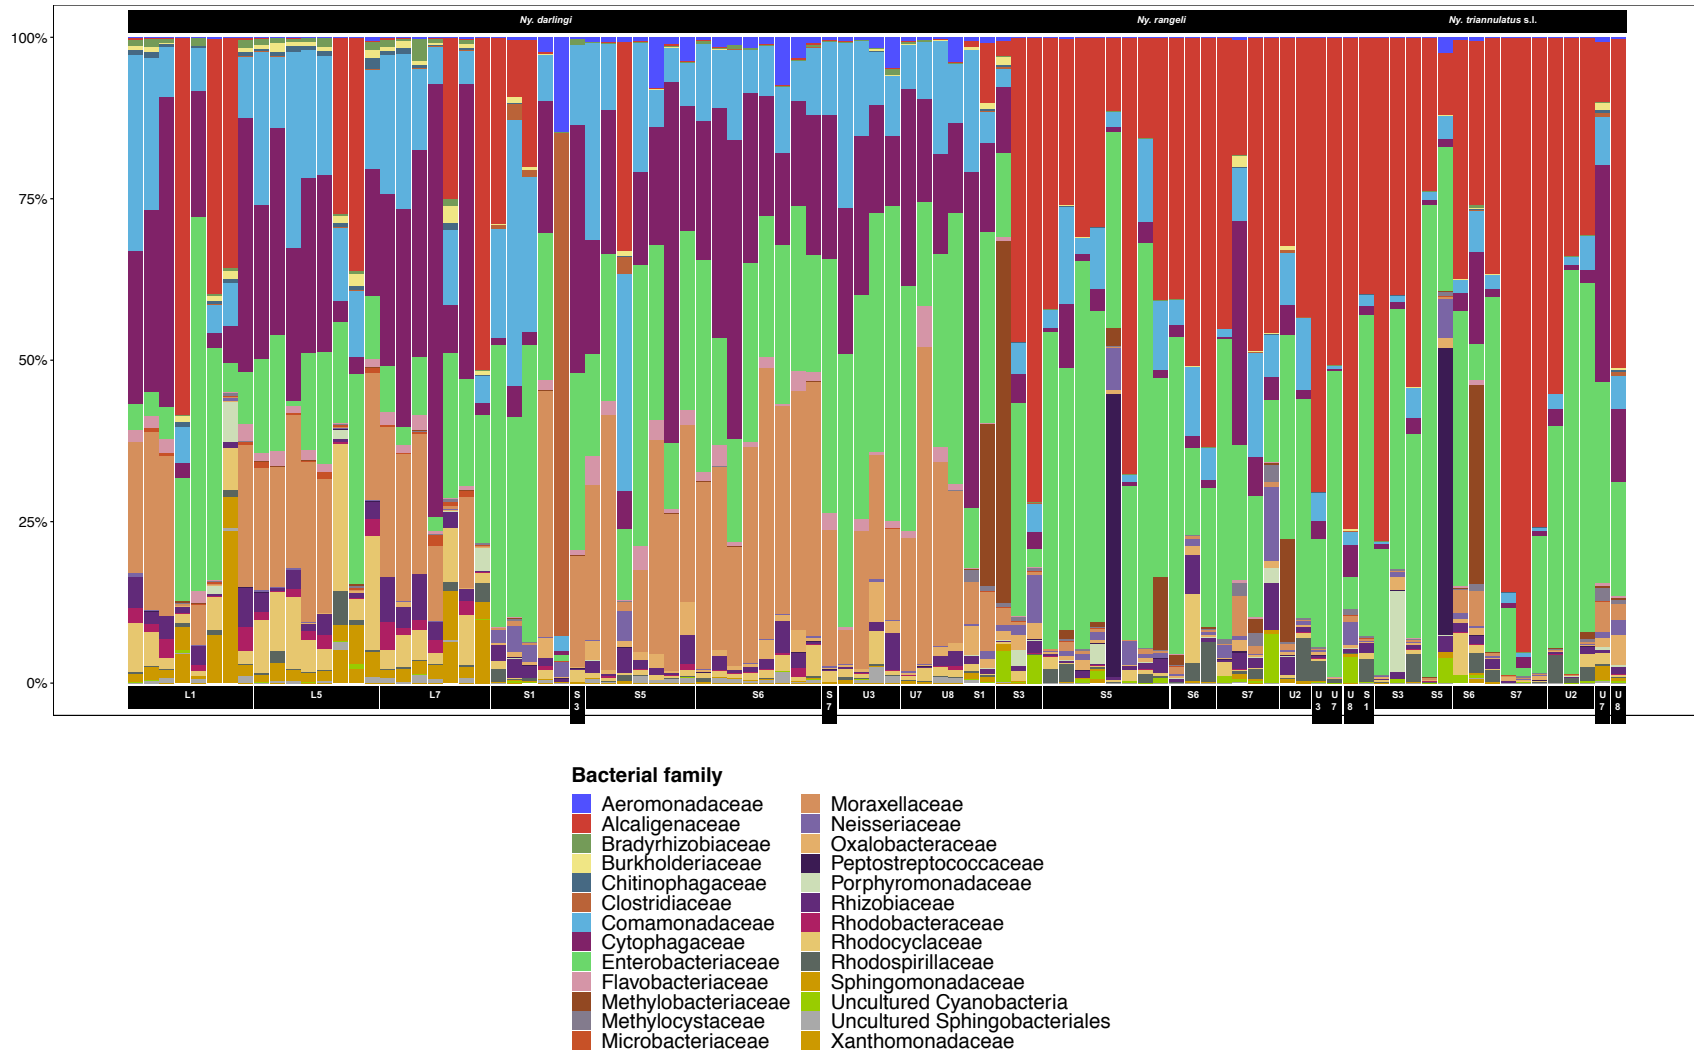

Supplement: Supplementary file [file 1]
